# Supplementary material for: Automated Segmentation and Object Classification of CT Images: Application toIn VivoMolecular Imaging of Avian Embryos
Source: Hindawi journal article supplement (doi:10.1155/2013/508474), 2013-01-01
Supplement: f1 [file 508474.f1.pdf]

# **Automated Segmentation and Object Classification of CT Images: Application to *In Vivo* Molecular Imaging of Avian Embryos**

## ***Supplementary Material***

Alexander Heidrich,<sup>1</sup> Jana Schmidt,<sup>2</sup> Johannes Zimmermann,<sup>3</sup>  
Hans Peter Saluz<sup>1,4</sup>

<sup>1</sup> *Department of Cell and Molecular Biology, Leibniz Institute for Natural Product Research and Infection Biology – Hans Knöll Institute, Jena, Germany*

<sup>2</sup> *Institut für Informatik / I12, Technische Universität München, Garching b. München, Germany*

<sup>3</sup> *Definiens AG, München, Germany*

<sup>4</sup> *Friedrich Schiller University of Jena, Jena, Germany*

*Correspondence to: Hans Peter Saluz; e-mail: [hanspeter.saluz@hki-jena.de](mailto:hanspeter.saluz@hki-jena.de)*

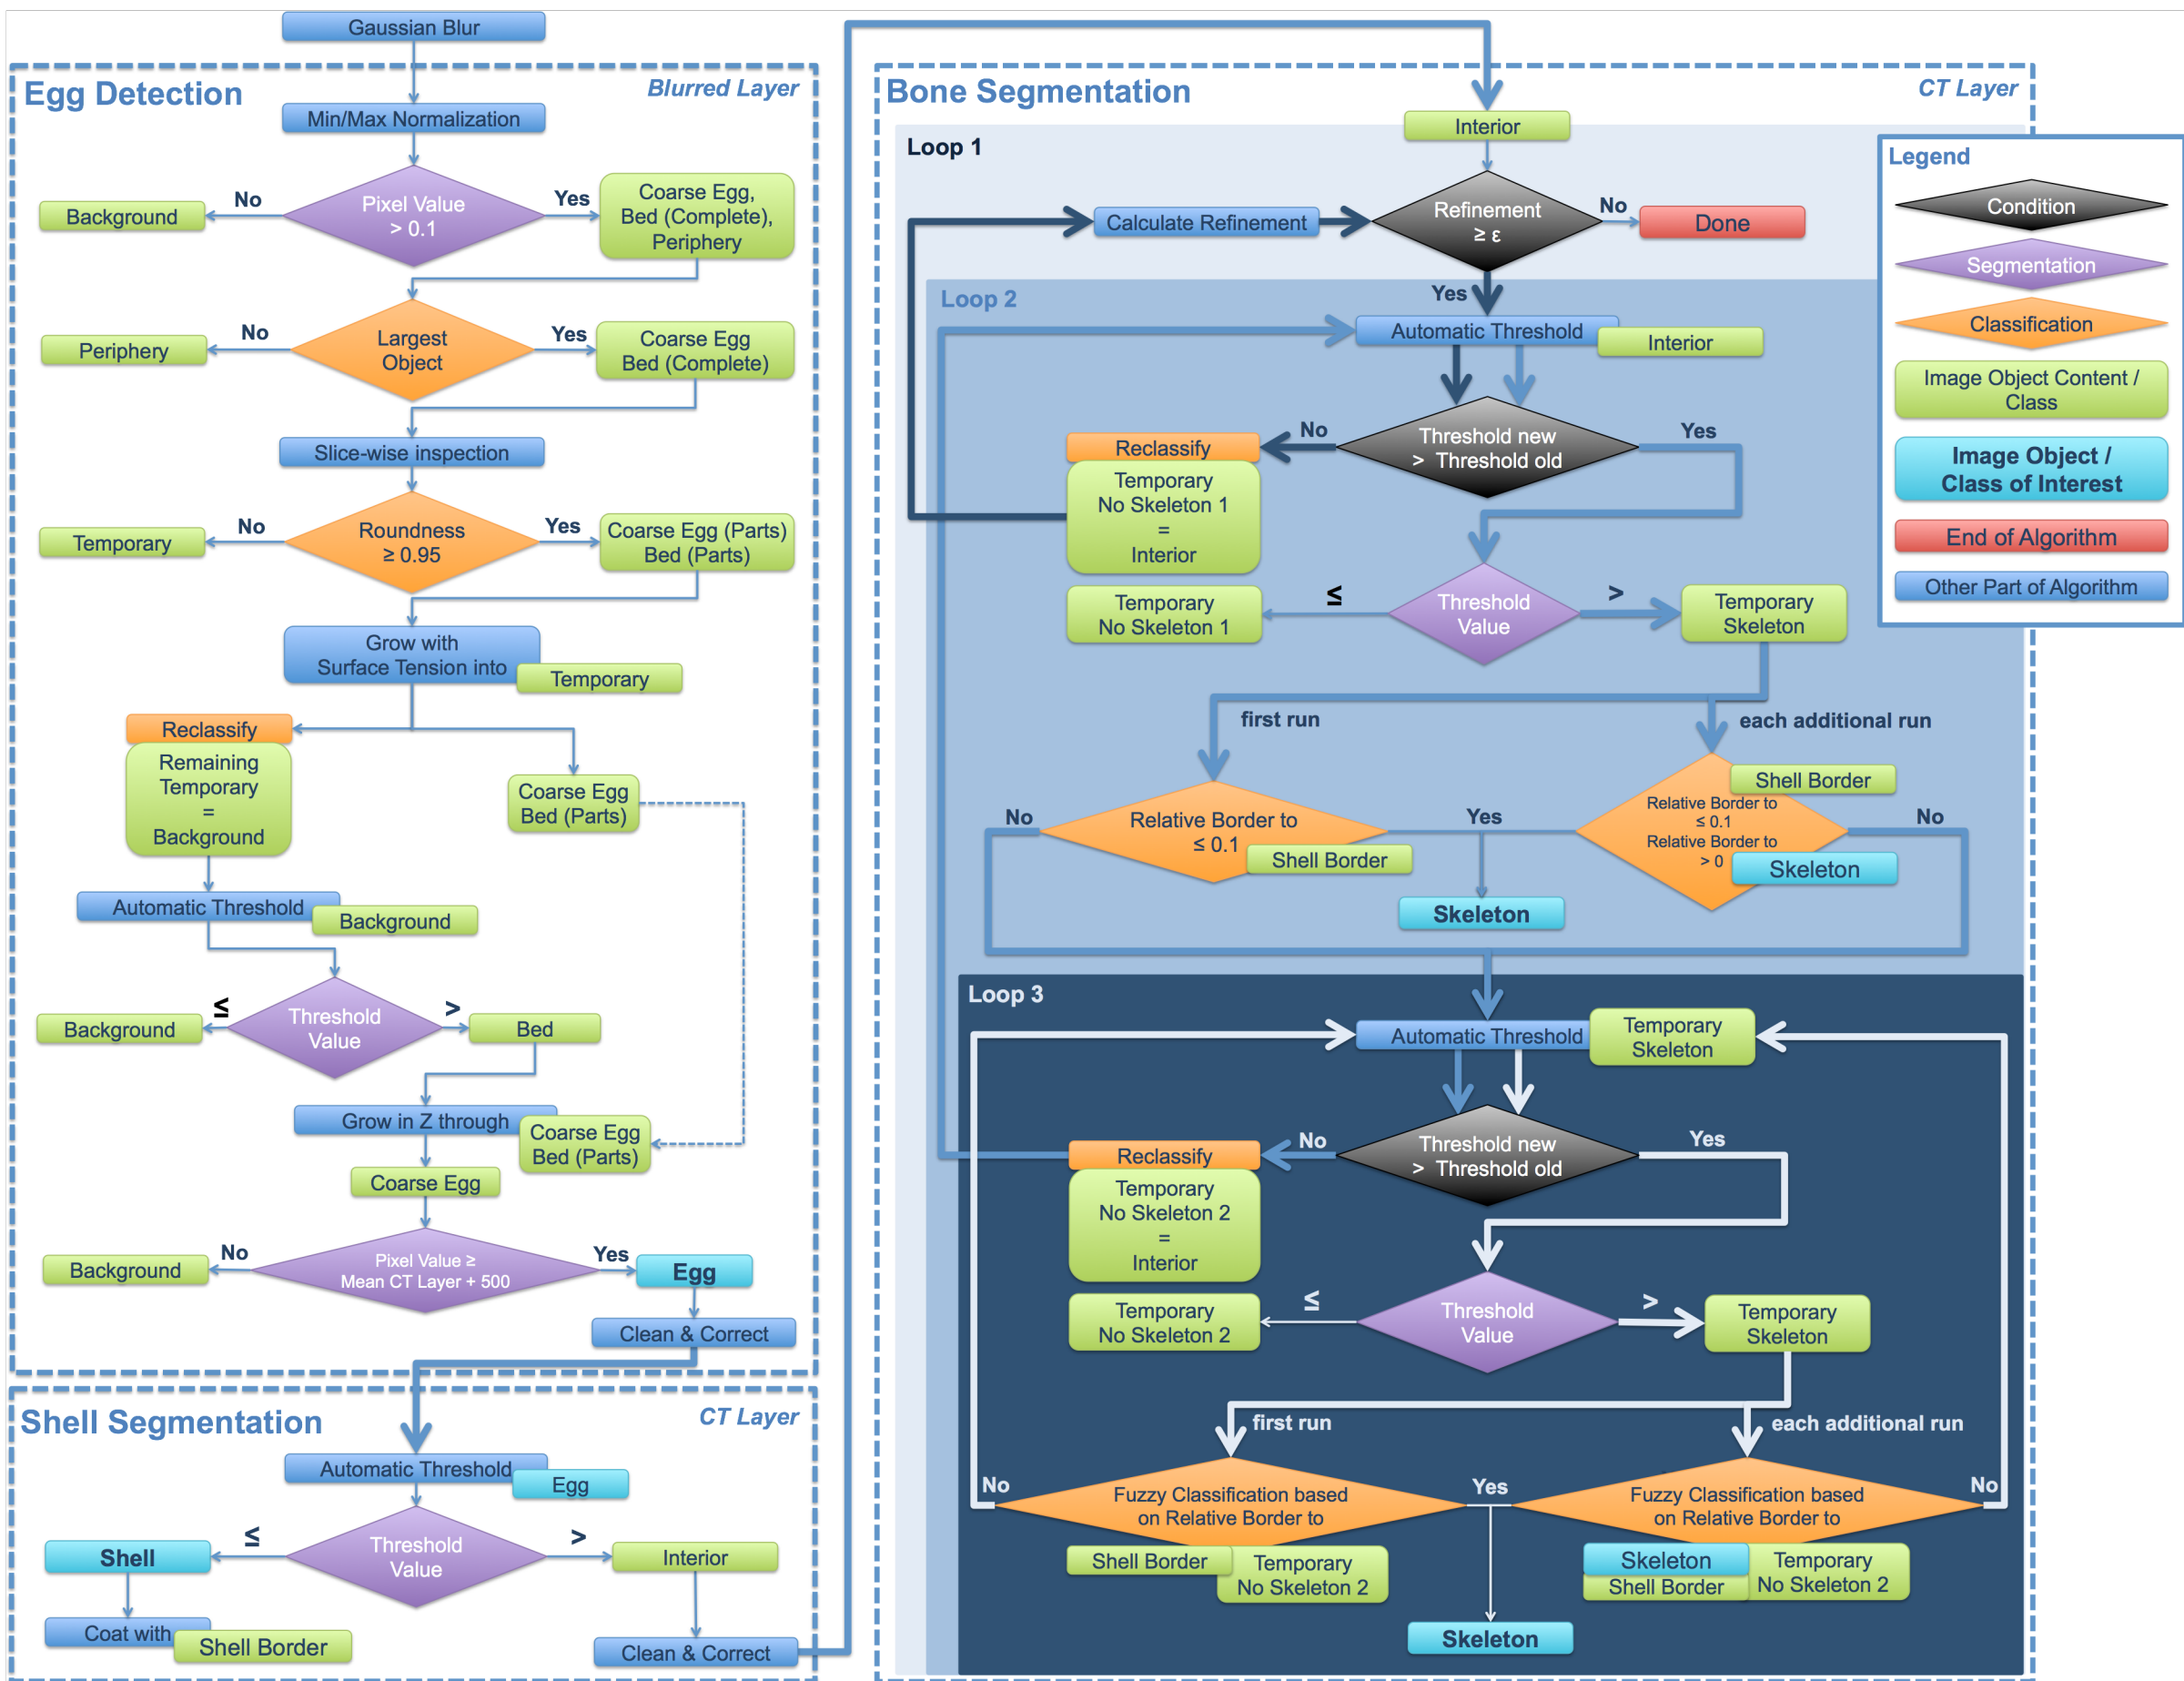

Supplemental Fig. S1 Graphical representation of the complete automated image segmentation procedure

**Supplemental Table S1.** Bone lengths of Group 2 chick embryos

| <b>Classes</b>  | <b>d13</b>            |          | <b>d14</b>            |          | <b>d15</b>            |          |
|-----------------|-----------------------|----------|-----------------------|----------|-----------------------|----------|
|                 | <b>Mean (mm ± SD)</b> | <b>n</b> | <b>Mean (mm ± SD)</b> | <b>n</b> | <b>Mean (mm ± SD)</b> | <b>n</b> |
| Humerus         | 3.425 ± 0.678         | 8        | 4.612 ± 1.208         | 8        | 5.238 ± 1.276         | 8        |
| Radius          | 2.454 ± 0.472         | 5        | 3.699 ± 0.937         | 6        | 4.202 ± 1.023         | 5        |
| Ulna            | 3.497 ± 0.475         | 8        | 4.820 ± 0.853         | 7        | 5.354 ± 0.981         | 7        |
| Carpometacarpus | 2.053 ± 0.427         | 8        | 2.856 ± 0.363         | 8        | 3.385 ± 0.398         | 8        |
| Femur           | 5.774 ± 1.232         | 8        | 7.400 ± 1.063         | 8        | 8.574 ± 1.830         | 8        |
| Tibiotarsus     | 8.200 ± 1.408         | 8        | 10.691 ± 1.801        | 8        | 13.380 ± 1.984        | 8        |
| Tarsometatarsus | 5.286 ± 0.804         | 8        | 6.758 ± 1.486         | 8        | 9.660 ± 1.349         | 5        |
